# Supplementary material for: Insulin responsiveness of glucose transporter 4 in 3T3-L1 cells depends on the presence of sortilin
Source: PubMed Central journal article supplement — Mol Biol Cell. 2013 Oct 1;24(19):3115–22. doi: 10.1091/mbc.E12-10-0765 (PMC3784384; doi:10.1091/mbc.e12-10-0765), 2013-10-01
Supplement: supp_E12-10-0765_CombinedSupMats.pdf [file supp_E12-10-0765_CombinedSupMats.pdf]

# Supplemental Materials

*Molecular Biology of the Cell*

Huang et al.

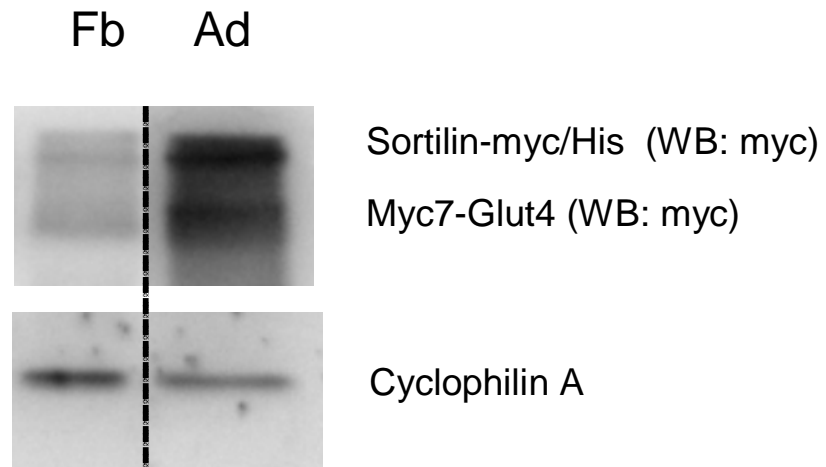

**Supplemental Figure 1. Expression of sortilin-myc/His and myc7-Glut4 is up-regulated in differentiating 3T3-L1 cells.** GS cells were induced to differentiate and harvested on day 6. Total cell lysates (40  $\mu$ g) were analyzed by Western blotting. Dotted line indicates that irrelevant lanes have been spliced out. A representative result of at least three independent experiments is shown.

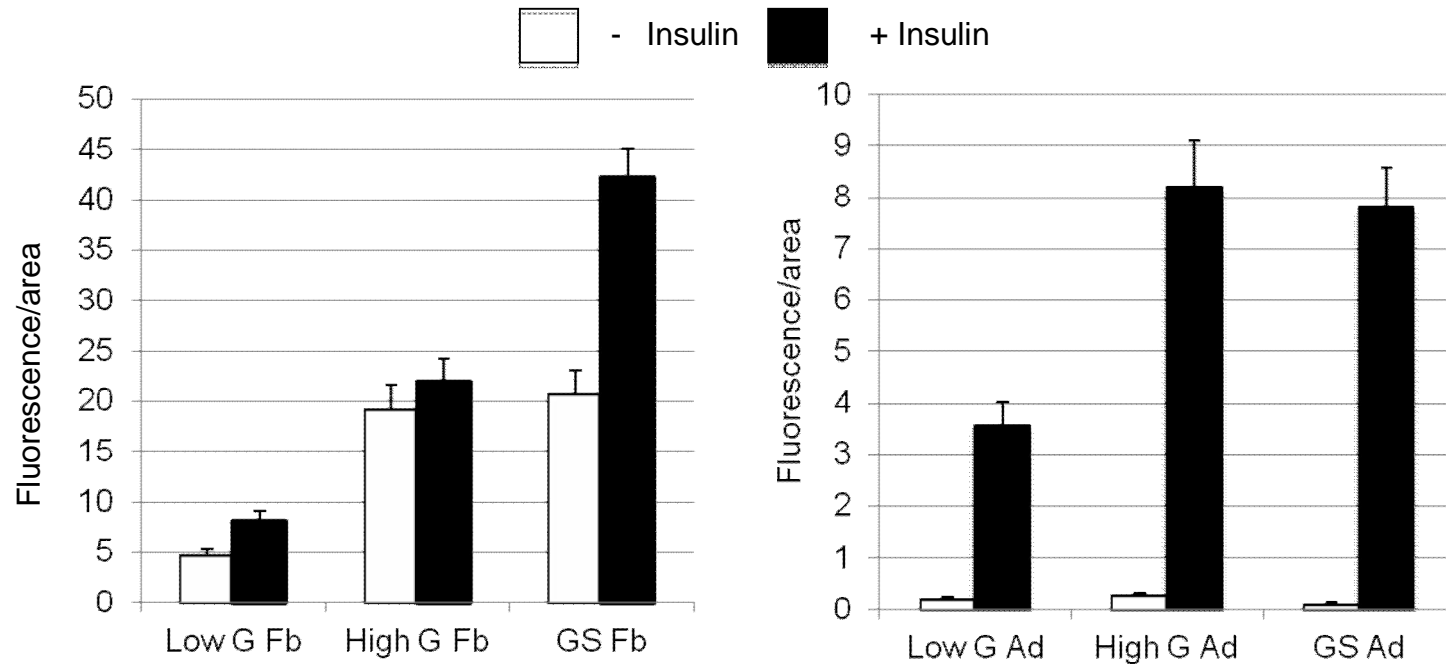

**Supplemental Figure 2. Plasma membrane localization of myc<sub>7</sub>-Glut4 in various cell lines.** Undifferentiated (Fb, left panel) and differentiated (Ad, right panel) cells were stained with mouse monoclonal anti-myc antibody in the absence of detergents as described in Materials and Methods. Images were matched for exposure and analyzed on an individual basis using ImageJ software. No less than 70 individual pre-adipocytes and no less than 23 adipocytes were counted per condition from 2-3 individual experiments. Basal adipocytes fluorescence was determined by spatially identifying cell location in bright field images. Graphs show normalized mean values +/- SE.

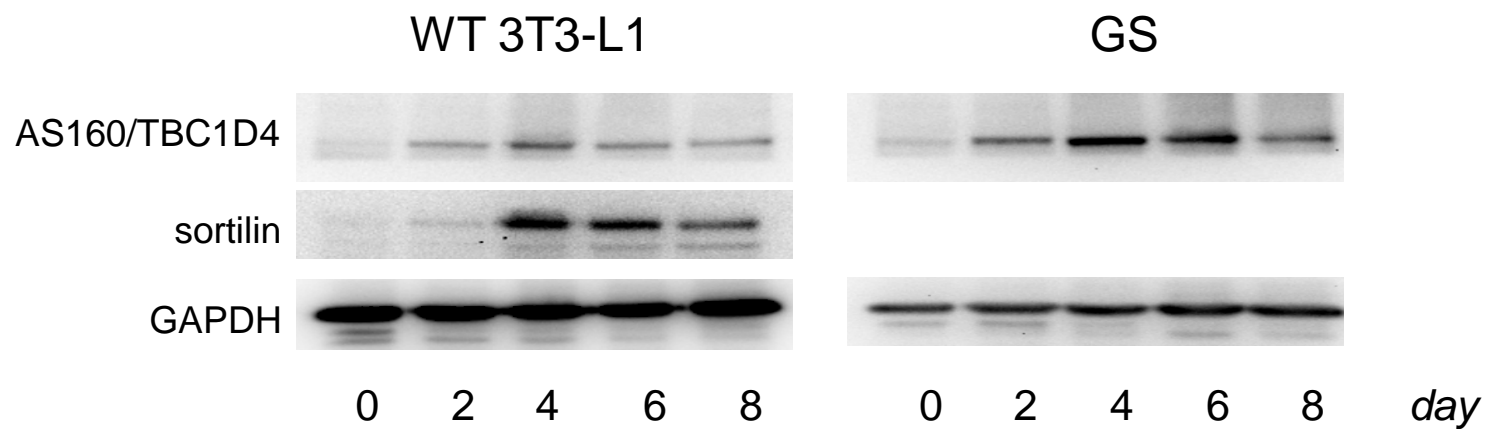

**Supplemental Figure 3. Expression of AS160/TBC1D4 in differentiation.** Wild type 3T3-L1 cells and GS cells were induced to differentiate (Day 0) and harvested on the indicated days. Total cell lysates (40  $\mu$ g) were analyzed by Western blotting.
